1 Hellbender Salamanders (*Cryptobranchus alleganiensis*) Exhibit an Ontogenetic Shift in  
2 Microhabitat Use in a Blue Ridge Physiographic Region Stream

3

4 K. A. Hecht<sup>1</sup>, M. J. Freake<sup>2</sup>, M. A. Nickerson<sup>3</sup>, and P. Colclough<sup>4</sup>

5

6 Running Title: Ontogenetic shift in Hellbender microhabitat

7

8 Keywords: Amphibian, Ecology, Lotic, Salamander, Shelter, Substrate

9

10 <sup>1</sup> PO Box 116455, School of Natural Resources and Environment, University of Florida,  
11 Gainesville, Florida 32611; Email: [kirstenhecht@ufl.edu](mailto:kirstenhecht@ufl.edu).

12 <sup>2</sup> PO Box 117800 Florida Museum of Natural History, University of Florida, Gainesville, Florida  
13 32611; Email: [maxn@flmnh.ufl.edu](mailto:maxn@flmnh.ufl.edu)

14 <sup>3</sup>Department of Natural Sciences and Mathematics, Lee University, Cleveland, Tennessee 37320;  
15 Email: [mfreake@leeuniversity.edu](mailto:mfreake@leeuniversity.edu)

16 <sup>4</sup> Zoo Knoxville, 3500 Knoxville Zoo Drive, Knoxville, Tennessee 37914; Email:  
17 [pcolclough@zooknoxville.org](mailto:pcolclough@zooknoxville.org)

18

19

20

21 **ABSTRACT**

22 Organisms that experience large changes in body size during the life span often exhibit  
23 differences in resource use among life stages. Ontogenetic shifts in habitat use reduce  
24 intraspecific competition and predation and are common in lotic organisms. Although  
25 information on the immature life stages of the Hellbender (*Cryptobranchus alleganiensis*) is  
26 limited, this aquatic salamander exhibit's ontogenetic shifts in habitat use in some streams, with  
27 adults sheltering under large rocks and larvae utilizing interstitial spaces of gravel beds. Due to  
28 the geomorphology of Little River, Tennessee, however, limited interstitial spaces within the  
29 gravel are filled with sand. Therefore we quantified microhabitat parameters for three life stages  
30 of Hellbenders (larvae, sub-adult, adult) to determine if an ontogenetic shift in microhabitat  
31 occurred in this location. We found no significant differences in stream substrate at capture sites  
32 among the stages, but there was a positive correlation between rock shelters underlain with very  
33 coarse gravel and overall Hellbender occupancy. Although we found no difference in water  
34 quality parameters and streambed particle size among the stage classes at the site of capture, there  
35 was a significant difference in the average shelter size among all stages, with larvae utilizing the  
36 smallest shelters. As the smaller rocks utilized by larvae in Little River could be less secure  
37 shelter than the larger rocks used by adults, mortality may be higher in young Hellbenders due to  
38 a potential increase in overall predation risk and susceptibility to flooding. Based on these results,  
39 future Hellbender research and conservation efforts should consider differences in life stage  
40 habitat use as well as specific stream particle classes.

41

42

43           Body size is a key factor in many facets of ecology. At larger scales, the size of species  
44 helps determine the trophic structure and spatial distribution of ecological communities  
45 (Hutchinson and MacArthur, 1959; Schoener, 1974; Werner and Gilliam, 1984; Brown et al.,  
46 1991; Woodward et al., 2005; Rojas and Ojeda, 2010), while at the individual scale body size  
47 influences energetics (Gillooly et al., 2001), prey (Wilson, 1975; Mittelbach, 1981; Cohen et al.,  
48 1993), habitat use (Hall and Werner, 1977; Foster et al., 1988; Flinders and Magoulick, 2006;  
49 Barriga and Battini, 2009; Foster et al., 2009), and predation risk (Werner and Hall, 1988; Giller  
50 and Malmqvist, 1998; Urban, 2008). Because size has such a strong influence on the ecology of  
51 organisms, species that experience large changes in body size during their lifespan can  
52 experience substantial differences in ecology across life stages. Werner and Gilliam (1984)  
53 defined these changes, called ontogenetic shifts, as the “patterns in an organism’s resource use  
54 that develop as it increases in size from birth or hatching to its maximum.” While these changes  
55 are often a result of morphological constraints, change in resource use across the life span of a  
56 species can be an advantageous life history strategy. These shifts reduce intraspecific competition  
57 and predation among stage classes (Werner and Gilliam, 1984). In cannibalistic species shifts in  
58 habitat use among size or stage classes can reduce mortality of young individuals by intraspecific  
59 predation (Foster et al., 1988; Keren-Rotem et al., 2006).

60           Body size changes in species are especially relevant in lotic systems. Reynolds number,  
61 which is the ratio of inertia and viscous forces with a fluid, increases with body size (Giller and  
62 Malmqvist, 1998). Organisms with different Reynolds numbers experience varying impacts from  
63 stream flow with inertial forces becoming more important at higher Reynolds numbers, and may  
64 also differ in gas exchange abilities (Giller and Malmqvist, 1998). Ultimately body size  
65 influences microhabitat use in streams, with larger individuals more likely to reside in the water

66 column and smaller animals governed by viscous forces typically inhabiting the stream substrate.  
67 Because of these changes, ontogenetic shifts in resource use are documented in aquatic organisms  
68 and occur in a wide range of lotic taxa across different trophic levels including invertebrates  
69 (Holomuzi and Short, 1990; Giller and Sangpradub, 1993; Flinders and Magoulick, 2006), fish  
70 (Merigoux and Ponton, 1998; Simonovic et al., 1999; Rosenberger and Angermeier, 2003; King,  
71 2005; Barriga and Battini, 2009) and salamanders (Petranka, 1984; Colley et al., 1989; Nickerson  
72 et al., 2003). These shifts in resource use among life stages may help mitigate challenging  
73 conditions in lotic environments such as flow, environmental variability, and limited dispersal  
74 potential.

75         Ontogenetic shifts in resource use have been noted in the Hellbender (*Cryptobranchus*  
76 *alleganiensis*), a cannibalistic lotic salamander species that can increase in size over its lifetime  
77 by a factor of 20. Hatchlings measure 25—30 mm total length (TL), while the largest adult found  
78 measured 745 mm TL (Fitch, 1947). Larval Hellbender diet largely consists of aquatic insects  
79 (Smith, 1907; Pitt and Nickerson, 2006; Hecht-Kardasz, 2011) while adults mostly eat crayfish  
80 (Netting, 1929; Green, 1933; Green, 1935; Nickerson and Mays, 1973; Peterson et al., 1989).  
81 Based on limited data, larval Hellbenders in some localities may utilize different microhabitat  
82 than adults, who generally shelter under large rocks (Bishop, 1941; Hillis and Bellis, 1971;  
83 Nickerson and Mays, 1973). In the North Fork of the White River, Missouri, larvae have been  
84 associated with gravel beds (Nickerson et al., 2003), while bank searches in the Allegheny River,  
85 New York, located more smaller Hellbender size classes than in previous conventional rock  
86 lifting surveys (Foster et al., 2009).

87         In Little River, Tennessee the streambed's geology led to sand and other small particles  
88 filling in the interstitial spaces within the gravel where larvae have been found in other streams

89 (Nickerson et al., 2003; Pitt et al., 2016). Instead larvae have been found under rocks on the  
90 streambed surface like adults (Nickerson et al., 2003). Despite this difference, almost a third of  
91 sampled Hellbenders from Little River were larval sized (<125 mm) (Hecht-Kardasz et al., 2012).  
92 Due to the Hellbender's known use of cannibalism (Humphries et al., 2005; Groves and  
93 Williams, 2014) as well as the great change in size from hatching to maturation, we expect that  
94 Hellbenders would still exhibit ontogenetic shifts in microhabitat at this location. To study this  
95 hypothesis, we examined the following microhabitat factors in Little River: water depth, shelter  
96 size, stream substrate, pH, conductivity, and water temperature. These factors are known to affect  
97 detectability, food sources, oxygen concentration, and health of aquatic organisms.

## 98 **MATERIALS AND METHODS**

99 *Site description.*—Based on the results of previous studies (Nickerson et al., 2003), Hellbender  
100 surveys were conducted within an ~3 km section of Little River known to contain the three stage  
101 classes (larvae, sub-adult, and adult). Little River, located in eastern Tennessee's portion of the  
102 Great Smoky Mountains National Park, originates on the north slope of Clingmans Dome, and  
103 flows 29 km within the park. It continues through the towns of Townsend, Maryville, Alcoa, and  
104 Rockford before eventually draining into the Tennessee River. The Little River watershed drains  
105 an area of approximately 980 km<sup>2</sup>.

106 Little River lies entirely within the southern portion of the Blue Ridge physiographic  
107 province. The bedrock of Little River is comprised primarily of late Precambrian Elkmont and  
108 Thunderhead metamorphosed sandstone (Mast and Turk, 1999). Over time flowing water has  
109 eroded away some exposed bedrock leaving large densities of dense rounded boulders, cobble,  
110 and gravel in the streambed. A Wolman pebble count (Wolman, 1954) in the study area found a  
111 D50 value, which represents the median substrate size, in the very coarse gravel category (32--64

112 mm) (Hecht-Kardasz, 2011). Interstitial habitat is limited within the Little River streambed as  
113 sand often fills in many portions of the gravel beds. The elevation of the study area ranged from  
114 327—407 m. Vegetation within the stream was uncommon, and the riparian vegetation was  
115 classified as pine and river cove hardwood forest (Madden et al., 2004). The area has a temperate  
116 climate, with an average annual rainfall of 142 cm and temperature averages of 3.17°C in winter  
117 and 21.7°C in summer (National Oceanic and Atmospheric Administration, 2016).

## 118 **Field methods**

119 Diurnal skin diving combined with rock lifting was used to survey for Hellbenders during  
120 the following sampling periods: June—July 2005, June—July 2006, June—August 2008, Aug—  
121 Oct 2009, July—Sept 2010. Some surveyors occasionally used log peaveys to lift larger rocks.  
122 Hellbenders were captured by hand. We measured total length (TL) and snout-vent length (SVL)  
123 of most sub-adult and adult Hellbenders with the aid of modified PVC pipe. Small sub-adults and  
124 larvae were placed in a wet zip lock bag prior to measurement. Hellbenders were individually  
125 marked before release (see Hecht-Kardasz et al., 2012).

126 Microhabitat parameters were measured directly at the point of capture. Because  
127 Hellbenders are largely nocturnal (Nickerson and Mays, 1973) and generally have small home  
128 ranges and exhibit site fidelity (Hillis and Bellis, 1971; Wiggs, 1977; Nickerson and Mays, 1973;  
129 Blais, 1996; Ball, 2001), we assumed that the microhabitat at point of capture accurately  
130 represented microhabitat of Hellbenders during the survey period. Water temperature, pH, and  
131 conductivity were measured using the Combo pH/EC/TDS/Temperature Tester with Low Range  
132 EC and Watercheck pH reader (HANNA Instruments®, Woonsocket, RI, USA). Water depth and  
133 shelter size, defined as the longest length of the shelter rock, was also recorded. We recorded  
134 stream flow with a Global Water Flow Probe (Global Water Instrumentation, Inc., College

135 Station, TX, USA) and DO with the Hi 9142 Dissolved Oxygen Meter (HANNA Instruments®,  
136 Woonsocket, RI, USA) but due to equipment failure, these data were not analyzed.

137 To test for differences in stream substrate associated with shelter rocks, we measured a  
138 handful of streambed particles under confirmed shelter rocks using the Federal Interagency  
139 Sedimentation Project (FISP) US SAH-97 sediment size analyzer, also known as a gravelometer.  
140 Samples ranged from 1—8 particles, with a mean of 4.23 ( $\pm 1.55$ ) particles. To compare the  
141 stream substrate beneath shelters with the streambed particles in the general sampling area, we  
142 also measured a handful of substrate at fifty random localities within the study area chosen using  
143 a random number table.

#### 144 **Analyses**

145 Individual Hellbenders were classified into stage classes using TL. Individuals <125 mm  
146 in TL, both gilled and non-gilled, were classified as larvae. Larvae were also classified into first  
147 (<90 mm TL) and second year (>100 mm TL) age classes for shelter size analysis based on  
148 previous studies and the results of surveys in Little River (Smith, 1907; Bishop, 1941; Hecht-  
149 Kardasz et al., 2012). Three individuals between 90—100 mm TL could not be classified to an  
150 age class and were therefore not used in analysis comparing larval age classes. All individuals  
151 measuring 125—275 mm TL were considered sub-adults, while any individuals over 275 mm  
152 were classified as adults. Further justification for stage class classifications can be found in  
153 Hecht-Kardasz et al., 2012.

154 We analyzed data using base packages in R version 3.2.2 (R Core Team, 2015) unless  
155 otherwise specified. We calculated mean ( $\pm$  SD) for all continuous normally-distributed habitat  
156 variables and median for non-normal continuous variables. To examine the relationships between

157 habitat variables and Hellbender TL, we performed simple linear regressions. Habitat parameters  
158 were also compared among life stages. As water depth, larval shelter size, and conductivity data  
159 were not normally distributed, these parameters were tested using Kruskal-Wallis rank sum tests  
160 with pairwise comparisons performed using the `pairw.kw` function in the `asbio` package (Aho,  
161 2014). The remaining normally distributed parameters were evaluated using ANOVA and t-tests.  
162 In order to control family wise error rate at 0.05, Bonferroni's correction was used for all  
163 individual pairwise test of means.

164 All streambed particle sizes were classified into categories according to the American  
165 Geophysical Union proposed grade scale (Lane, 1947). Due to the low presence of some  
166 categories, all particles <4 mm were combined into one category before the data was used for  
167 statistical analysis. The presence/absence of streambed particle size at the site of capture was  
168 compared among stage classes using an ordinal logistic regression with the `lrm` function in  
169 package `rms` (Harrell, 2015). We also performed a binary logistic regression model using the `lrm`  
170 function to compare the presence/absence of particle categories between occupied sites and  
171 random locations. Due to weak correlations between smaller streambed particle size categories,  
172 additional models were tested combining all particles <32 mm into one category.

## 173 **RESULTS**

174 Runs contained the most individuals for all stage classes (83%, 82%, and 62% of larvae,  
175 sub-adults and adults respectively) followed by pools (11%, 14%, and 34%). Average pH at  
176 capture sites was  $7.24 \pm 0.28$  (Range 6.74—8.10; n=97). Mean conductivity was  $12.98 \pm 2.41$   
177  $\mu\text{S}/\text{cm}$  (range: 6.00—22.00  $\mu\text{S}/\text{cm}$ ; n=79). Water depth (range: 210—1800 mm; n=104) and  
178 water temperature (range: 14.60—22.80 °C; n=103) averaged  $527.86 \pm 248.00$  mm and  $22.84 \pm$   
179  $2.03$  °C respectively. Although regression analysis suggested a linear relationship between



180 Hellbender TL and water temperature (n=102), water temperature was not a strong predictor of  
181 Hellbender TL ( $R^2=0.042$ ;  $p=0.039$ ). A similar relationship was found between conductivity and  
182 Hellbender TL ( $R^2=0.080$ ;  $p=0.012$ ;  $n=78$ ). Linear regression analysis revealed no relationship  
183 between Hellbender TL and water depth (n=104) ( $R^2=0.024$ ;  $p=0.12$ ) or Hellbender TL and pH  
184 (n=96) ( $R^2=-0.011$ ;  $p=0.94$ ). No significant difference in average water depth ( $H(2)=4.32$ ;  
185  $p=0.12$ ), pH ( $F(2,97)=0.61$ ;  $p=0.55$ ) or temperature ( $F(2, 99)=1.751$ ;  $p=0.179$ ) was found among  
186 stage classes. Average conductivity was significantly different among stage classes ( $H(2)=8.03$ ;  
187  $p=0.018$ ). Posthoc pairwise comparisons found a significant difference between larval mean  
188 conductivity ( $14.93 \pm 4.34 \mu\text{S/cm}$ ;  $n=14$ ) and mean adult conductivity ( $12.53 \pm 1.59 \mu\text{S/cm}$ ;  
189  $n=43$ ;  $p=0.018$ ). There was no significant difference between larval and mean sub-adult  
190 conductivity ( $12.59 \pm 1.30 \mu\text{S/cm}$ ;  $n=22$ ;  $p=0.051$ ) or between adult and sub-adult conductivity  
191 ( $p=0.99$ ) (Fig. 2).

192 Shelter size ranged from 120--1470 mm with a mean of  $673.81 \pm 285.75$  mm (n=217).  
193 Based on the results of linear regression, we found a weak correlation between Hellbender TL  
194 and shelter size (n=217) ( $R^2=0.266$ ;  $p<0.001$ ) (Fig. 3). Although overall shelter size among the  
195 stage classes overlapped, average shelter size differed significantly among stage classes ( $F(2$ ,  
196  $214)=32.82$ ;  $p<0.001$ ; Fig. 4). Mean shelter size of larvae ( $464.36 \pm 244.65$  mm;  $n=61$ ) was  
197 significantly different from both adults ( $794.44 \pm 254.27$  mm;  $n=100$ ;  $t = 8.11$ ,  $df = 159$ ,  $p\text{-value}$   
198  $= <0.001$ ) and sub-adults ( $686.55 \pm 252.46$  mm,  $n=56$ ;  $t=-4.83$ ,  $df = 115$ ,  $p\text{-value} = <0.001$ ). Sub-  
199 adults (n=56) and adults (n=100) also differed significantly in mean shelter size ( $t = 2.55$ ,  $df =$   
200  $154$ ,  $p\text{-value} = 0.012$ ). There was no statistical difference between mean shelter size between first  
201 (n=49) and second year larvae (n=9) in Little River ( $H(1)=0.16$ ,  $p=0.69$ ). However, first year  
202 larvae utilized some larger shelter sizes, including one of 1085 mm while the largest shelter size

203 of second year larvae was 610 mm. One individual of 90 mm TL found beneath a 1286 mm  
204 boulder could not conclusively be categorized as a first or second year larva.

205 Streambed particle classes under shelter rocks of larvae (n=25), sub-adults (n=26), and  
206 adults (n=38) did not differ significantly (Table 1). There was no difference in significant terms  
207 when particles <32 mm were combined. When comparing random samples to locations of  
208 capture, however, Hellbenders appeared to utilize shelters underlain at least partially by very  
209 coarse gravel more than would be expected by chance (Table 2). Our model also found a negative  
210 association between Hellbender use and rock shelters overlaying fine gravel. Very coarse gravel  
211 was the only significant term in the model combining particles <32mm (Table 3).

## 212 **DISCUSSION**

213 While all Hellbender stage classes utilized boulder habitat, the significant difference in  
214 average shelter size among stage classes suggests that an ontogenetic shift in Hellbender habitat  
215 use occurs in Little River during the summer months. However, the wide range of shelter sizes  
216 used by larvae includes a direct overlap in shelter size with sub-adults and adults, which may be  
217 partially due to some young individuals dispersing from their site of hatching later than others.  
218 Young Hellbenders may remain in nesting sites for prolonged periods, as larval Hellbenders have  
219 been observed sharing rock shelters with adult males in in June and August (Groves et al., 2013).  
220 Second year larvae could be more selective in their choice of shelter due to experience with  
221 predators, however the sample size of second year larvae was relatively small so further research  
222 is warranted. The weak relationship of shelter size and Hellbender TL found during this study is  
223 notable because previous studies examining habitat use by Hellbenders have found no association  
224 between shelter size and Hellbender size (Hillis and Bellis, 1971; Humphries and Pauley, 2005).  
225 However, these studies have focused primarily on adult sized Hellbenders.

226           Flooding has been cited as a potential threat to Hellbender populations with several  
227 published reports of displaced, injured, and dead Hellbenders following high water events in  
228 other localities (Humphries, 2005; Miller and Miller, 2005; Bodinoff et al., 2012a). Previous  
229 work in Little River suggested that flooding may be influential in the size structure of the  
230 Hellbender population with anecdotal evidence showing absent size classes correlating with  
231 major flooding events (Nickerson et al., 2007; Hecht-Kardasz et al., 2012). The shelters used by  
232 immature Hellbenders could provide a mechanistic explanation for this hypothesis. Many lotic  
233 organisms survive spates by seeking refugia (Giller and Malmqvist, 1998), including the  
234 interstitial spaces in the benthic layers, where larval *C. alleganiensis* have been located in other  
235 localities (Smith, 1907; Nickerson and Mays, 1973; Nickerson et al., 2003). As this habitat is not  
236 available to larval Hellbenders in Little River, larvae are utilizing the space under rocks at the  
237 surface of the streambed which may be less secure during flooding periods. While larvae utilized  
238 a wide variety of shelters in Little River, their habitat included much smaller shelter sizes than  
239 other stage classes including small and large cobble, and the average shelter size used by larvae  
240 was significantly smaller than sub-adults and adults. Smaller shelters may be easily moved by  
241 increased water current, increasing the risk of the Hellbender larvae underneath being crushed,  
242 swept downstream, or exposed to predators. Researchers recently found a crushed larvae in Little  
243 River following a high water event (Da Silva Neto et al., 2016). Related mortality or  
244 displacement of immature Hellbenders during extreme flooding related to less secure habitats  
245 may partially be responsible for the size structure patterns found in Little River's captured  
246 Hellbender population.

247           Due to the lack of gravel bed habitat in Little River, the interstitial spaces among the  
248 gravel, cobble, and boulders beneath the larger shelter rocks may be particularly important to

249 Hellbender larvae for additional protection and access to smaller food items. However, larvae  
250 were found directly under shelter rocks rather than underlying cobble or gravel (Hecht, pers. obs),  
251 and no difference in stream particle sizes below shelter rocks was noted among the stage classes.  
252 This suggests that other factors might be influencing habitat selection by Hellbenders in relation  
253 to substrate beneath shelter sites. For example Bodinoff et al (2012b) found that spacing of  
254 substrate was an important factor in Hellbender habitat selection for released captive raised  
255 Hellbenders, with individuals being more likely to select habitat resources where coarse substrate  
256 was touching.

257 Comparing streambed particle sizes at sites utilized by Hellbenders of all stage classes to  
258 randomly sampled localities revealed a negative association of occupancy with fine gravel, and a  
259 positive association of occupancy with very coarse gravel. It is unclear if these associations are  
260 due to habitat preferences and/or prey availability, or are simply related to space availability  
261 beneath shelter rocks. Smaller streambed particles could fill in the spaces underneath rocks,  
262 embedding them and leaving no area available for Hellbenders to occupy. Stream embeddedness  
263 has been negatively associated with the presence of other species of salamanders (Tumlinson and  
264 Cline, 2003). Conversely, boulders or large cobble may leave too much space available beneath  
265 shelter rocks, leaving Hellbenders with reduced protection from stream flow, predators, and con-  
266 specific. The association of shelters used by Hellbenders and medium sized particles, like very  
267 coarse gravel, may represent a balance of space availability and protection as well as food  
268 availability. Other studies have examined the role of streambed particle sizes on the occupancy of  
269 Hellbender but have been unable to compare streambed particle association among stage classes.  
270 Most studies have focused on broader particle categories rather than the more fine scale  
271 categories used in this study, but found a general association between gravel and/or cobble

272 substrates and Hellbender occupancy (Keitzer, 2007; Maxwell, 2009; Burgmeier et al., 2011;  
273 Bodinoff et al, 2012b). These types of streambed particles are known to harbor a number of  
274 salamander species including Hellbender larvae (Smith, 1907; Nickerson and Mays, 1973;  
275 Tumlinson et al., 1990) and also serve as important macro-invertebrate habitat (Giller and  
276 Malmqvist, 1998; Hwa-Seong and Ward, 2007), which represent the most utilized food source  
277 for Hellbenders of all sizes.

278         Conductivity at larval sites was significantly different from adult sites. As conductivity  
279 measurements were low, and because there was little difference between the mean of the larval  
280 and other stage groups, it seems unlikely that this difference is biologically meaningful.  
281 However, conductivity impacts Hellbender distribution in other localities (Pitt et al., 2017). No  
282 other correlations between Hellbender TL or stage class and measured water quality parameters  
283 were noted. The majority of individuals in all three stage classes were found in runs, so mixing  
284 may have created largely homogenized water quality conditions. Parameters including pH and  
285 conductivity showed little temporal or spatial variation during the survey period, but as Little  
286 River is fed by surface water, water depth and water temperature varied due to fluctuations in  
287 precipitation. Because microhabitat parameters were assumed to be relatively constant through  
288 time, this study cannot conclusively rule out the effects of water depth and water temperature on  
289 ontogenetic habitat use during the survey period.

290         Our examination of Hellbender microhabitat associations assumed that individuals were  
291 associated with the microhabitat at diurnal capture sites for significant time periods. While a  
292 majority of studies support an association of adult Hellbenders to seasonal or longer habitats  
293 (Smith, 1907; Green, 1933; Hillis and Bellis, 1971; Wiggs, 1977; Nickerson and Mays, 1973;  
294 Nickerson, 1980; Blais, 1996; Ball, 2001), information regarding movement, activity, and site

295 fidelity of immature Hellbenders is extremely limited. Published information on larval movement  
296 is limited to a single observation of an individual moving along the stream margin an hour before  
297 to sunset (Floyd et al., 2013). It is unclear whether *C. alleganiensis* larvae are nocturnal or  
298 diurnal in the wild, although Smith (1907) noted that hatchlings avoided light. Although it is also  
299 unknown whether wild Hellbender larvae leave shelter to forage, other salamander larvae have  
300 reduced activity levels in the presence of predators, including cannibalistic conspecifics (Colley  
301 et al., 1989). In addition macro-invertebrates found in larval Hellbender diets are plentiful  
302 beneath rocks in Little River (Hecht-Kardasz, 2011), thus low larval Hellbender activity might be  
303 expected. Larvae overwinter at male-guarded nest sites, and are believed to generally disperse  
304 sometime in spring or early summer (Bishop, 1941), prior to the seasonal timeframe of this study.  
305 As we already discussed above, some larvae may leave nest shelters later in the summer, but  
306 those captured during this study were almost entirely solitary, making it likely that dispersion had  
307 already occurred. While it is not unreasonable to assume that young Hellbenders, like adults, are  
308 associated with specific locations for extended periods, it cannot be confirmed and therefore the  
309 results of the analyses presented here should be interpreted with caution.

310 Evidence is increasing that Hellbenders may exhibit ontogenetic shifts in habitat use, but  
311 the number of localities where larval individuals are found regularly is relatively small, making it  
312 difficult to determine how common this pattern may be across the range. Future tracking of  
313 larvae may help elucidate whether larvae are rare or are avoiding detection due to differences in  
314 microhabitat use. In addition, only a limited number of microhabitat parameters have been  
315 examined. Therefore, studies looking at additional parameters such as DO, stream flow, distance  
316 to bank, and shelter density are suggested. For these and already measured variables, an  
317 examination of upper and lower tolerances for stage classes may be more useful from an

318 ecological and conservation standpoint than examining in situ differences in means for the groups  
319 alone. Studies on larval Hellbender microhabitat during other seasons are also needed to  
320 determine if ontogenetic differences in microhabitat use occur throughout the year or are only  
321 limited to summer months.

322 Potential habitat differences among stage classes should be considered in future  
323 conservation and habitat restoration efforts. Immature individuals may be an important  
324 component for increasing some Hellbender population sizes as demonstrated by sensitivity  
325 analysis (Unger et al., 2013). Current Hellbender conservation efforts have focused heavily on  
326 head-starting and releasing individuals in order to boost adult populations. While these efforts are  
327 worthwhile and have proven successful (Bodinoff et al., 2012a), consideration of immature  
328 Hellbender habitat at release and restoration sites is necessary in order to achieve the long-term  
329 goal of self-sustaining Hellbender populations. While microhabitat needs may vary from site to  
330 site, our study indicates that sites should include heterogeneous substrate with very coarse gravel  
331 and cobble, in addition to a variety of boulders.

### 332 **AUTHOR CONTRIBUTIONS**

333 K. Hecht, M. Freake, and M. Nickerson contributed to the study design. K. Hecht, M. Freake, and  
334 P. Colclough assisted in acquiring data. K. Hecht and M. Freake analyzed and interpreted the  
335 data. K. Hecht drafted the manuscript, and all four authors critically reviewed and revised the  
336 manuscript.

### 337 **ACKNOWLEDGEMENTS**

338 Thank you to Dr. Marcy Souza, The Great Smoky Mountains Institute at Tremont, Dr. Perran  
339 Ross, Dr. Mary Christman, the Williams Lab at Purdue University, Andrea Drayer, and all

340 volunteers for assistance on this project. We would also like to acknowledge Paul Super, Keith  
341 Langdon, and the National Park Service. Financial support for this research was provided by the  
342 Great Smoky Mountains Conservation Association: Carlos C. Campbell Fellowship, The Reptile  
343 and Amphibian Conservation Corp (RACC), the Cryptobranchid Interest Group: Jennifer Elwood  
344 Conservation Grant. Research was conducted under permits from the National Park Service  
345 (GRSM-2009-SCI-0061, GRSM-20090056, GRSM-2008-SCI-0052, GRSM-00-131), and  
346 University of Florida ARC Protocol (#017-08WEC).

### 347 **LITERATURE CITED**

348 **Aho, K.** 2016. asbio: A Collection of Statistical Tools for Biologists. R package version 1.3-1.

349 <http://CRAN.R-project.org/package=asbio>

350 **Ball, B. S.** 2001. Habitat use and movements of eastern hellbenders, *Cryptobranchus*

351 *alleganiensis alleganiensis*: A radiotelemetric study. M.S. Thesis, Appalachian State  
352 University, Boone, NC.

353 **Barriga, J. P., and M. A. Battini.** 2009. Ecological significances of ontogenetic shifts in the  
354 stream-dwelling catfish, *Hatcheria macraei* (Siluriformes, Trichomycteridae), in a  
355 Patagonian river. Ecology of Freshwater Fish 18(3):395-405.

356 **Bishop, S. C.** 1941. The Salamanders of New York. New York State Museum Bulletin, The  
357 University of the State of New York, Albany, NY.

358 **Blais, D. P.** 1996. Movement, home range, and other aspects of the biology of the eastern  
359 hellbender (*Cryptobranchus alleganiensis alleganiensis*): A radiotelemetric study. M.S.  
360 Thesis, State University of New York at Binghamton, Binghamton, NY.



- 361 **Bodinof, C. M., J. T. Briggler, R. E. Junge, T. Mong, J. Beringer, M. D. Wanner, C. D.**  
362 **Schuette, J. Ettling, and J. J. Millspaugh.** 2012a. Survival and body condition of  
363 captive-reared juvenile Ozark hellbenders (*Cryptobranchus alleganiensis bishopi*)  
364 following translocation to the wild. *Copeia* 2012(1):150-159.
- 365 **Bodinof, C. M. J. T. Briggler, R. E. Junge, J. Beringer, M. D. Wanner, C. D. Schuette, J.**  
366 **Ettling, and J. J. Millspaugh.** 2012b. Habitat attributes associated with short-term  
367 settlement of Ozark Hellbender (*Cryptobranchus alleganiensis bishopi*) salamanders  
368 following translocation to the wild. *Freshwater Biology* 2012(57):178-192.
- 369 **Burgmeier, N. G., T. M. Sutton, and R. N. Williams.** 2011. Spatial ecology of the Eastern  
370 Hellbender (*Cryptobranchus alleganiensis*) in Indiana. *Herpetologica* 67(2):135-145.
- 371 **Brown, J.H., and P. F. Nicoletto.** 1991. Spatial scaling of species composition: body masses of  
372 North American land mammals. *American Naturalist* 138(6):1478-1512.
- 373 **Cohen, J. E., S. L. Pimm, P. Y. Yodzis, and J. Saldana.** 1993. Body sizes of animal predators  
374 and animal prey in food webs. *Journal of Animal Ecology* 62(1):67-78.
- 375 **Colley, S. W., W. H. Keen, and R. W. Reed.** 1989. Effects of adult presence on behavior and  
376 microhabitat use of juveniles of a Desmognathine salamander. *Copeia* 1989(1):1-7.
- 377 **Da Silva Neto, J. G., W. B. Sutton, J. B. Giacomini, R. E. Freemon, and M. Freake.** (2016).  
378 *Cryptobranchus alleganiensis alleganiensis* (Eastern Hellbender). Mortality.  
379 *Herpetological Review* 47(1):98-99.
- 380 **Fitch, F. W.** 1947. A record *Cryptobranchus alleganiensis*. *Copeia* 1947(3):210.
- 381 **Flinders, C. A., and D. D. Magoulick.** 2007. Habitat use and selection within Ozark lotic  
382 crayfish assemblages: spatial and temporal variation. *Journal of Crustacean Biology*  
383 27(2):242-254.

- 384 **Floyd, T. M, T. S. M. Stratmann, G. J. Brown, III, and S. Pfaff.** 2013. *Cryptobranchus*  
385 *alleganiensis alleganiensis*. Terrestrial Movement. Herpetological Review 44(4): 651.
- 386 **Foster, R. L., A. M. McMillan, and K. J. Roblee.** 2009. Population status of hellbender  
387 salamanders (*Cryptobranchus alleganiensis*) in the Alleghany River Drainage of New  
388 York State. Journal of Herpetology 43(4):579-588.
- 389 **Foster, S. A., V. B. Garcia, and M. Y. Town.** 1988. Cannibalism as the cause of an ontogenetic  
390 shift in habitat use by fry of the threespine stickleback. Oecologia 74(4):577-585.
- 391 **Giller, P. S., and B. Malmqvist.** 1998. The Biology of Streams and Rivers. Oxford University  
392 Press, Inc., New York, NY.
- 393 **Giller, P. S., and N. Sangpradub.** 1993. Predatory foraging behaviour and activity patterns of  
394 larvae of two species of limnephilid cased caddis. Oikos 67(2):351-357.
- 395 **Gillooly J. F, J. H Brown, G. B. West, V. M. Savage, and E. L. Charnov.** 2001. Effects of size  
396 and temperature on metabolic rate. Science 293(5538):2248-2251.
- 397 **Groves, J. D., and L. A. Williams.** 2014. *Cryptobranchus alleganiensis alleganiensis* (Eastern  
398 Hellbender). Cannibalism. Herpetological Review 45(1):108-109.
- 399 **Groves, J. D., L. A. Williams, and S. P. Graham.** 2015. *Cryptobranchus alleganiensis*  
400 *alleganiensis* (Eastern Hellbender). Larval/adult association. Herpetological Review  
401 46(1):70-71.
- 402 **Green, N. B.** 1933. *Cryptobranchus alleganiensis* in West Virginia. Proceedings of the West  
403 Virginia Academy of Sciences 7:28-30.
- 404 **Green, N. B.** 1935. Further notes on the food habits of the water dog, *Cryptobranchus*  
405 *alleganiensis* Daudin. Proceedings of the West Virginia Academy of Sciences 9:36.

- 406 **Hall, D. J., and E. E. Werner.** 1977. Seasonal distribution and abundance of fishes in the littoral  
407 zone of a Michigan Lake. Transactions of the American Fisheries Society 106(6):545-  
408 555.
- 409 **Harrell, F.** 2015. rms: Regression Modeling Strategies. R package version 4.4-0.  
410 <http://CRAN.R-project.org/package=rms>
- 411 **Hecht-Kardasz, K.** 2011. Influence of geomorphology on the population structure and ecology  
412 of the Hellbender salamander (*Cryptobranchus alleganiensis*). M.S. Thesis, University of  
413 Florida, Gainesville, FL.
- 414 **Hecht-Kardasz, K. A, M. A. Nickerson, M. Freake, and P. Colclough.** 2012. Population  
415 structure of the Hellbender (*Cryptobranchus alleganiensis*) in a Great Smoky Mountains  
416 stream. Bulletin of the Florida Museum of Natural History 51:227-241.
- 417 **Hillis, R. E., and E. D. Bellis.** 1971. Some aspects of the ecology of the hellbender,  
418 *Cryptobranchus alleganiensis alleganiensis*, in a Pennsylvania stream. Journal of  
419 Herpetology 5(3-4):121-126.
- 420 **Holomuzki, J. R., and T. M. Short.** 1990. Ontogenetic shifts in habitat use and activity in a  
421 stream-dwelling isopod. Holartic Ecology 13:300-307.
- 422 **Humphries, W. J.** 2005. *Cryptobranchus alleganiensis* (hellbender). Displacement by a flood.  
423 Herpetological Review 36(4):428.
- 424 **Humphries, W. J., M. Solis, C. Cardwell, and A. Salveter.** 2005. *Cryptobranchus*  
425 *alleganiensis* (Hellbender). Cannibalism. Herpetological Review 36(4):428
- 426 **Humphries, W. J, and T. K. Pauley.** 2005. Life history of the Hellbender, *Cryptobranchus*  
427 *alleganiensis*, in a West Virginia stream. American Midland Naturalist 154:125-142
- 428 **Hutchinson, G. E., and R. H. MacArthur.** 1959. A theoretical ecological model of size  
429 distributions among species of animals. American Naturalist 93(869):117-125.

- 430 **Hwa-Seong, J., and G. M. Ward.** 2007. Life history and secondary production of *Glossosoma*  
431 *nigrum* Banks (Trichoptera: Glossosomatidae) in two Alabama streams with different  
432 geology. *Hydrobiologia* 575:245-258.
- 433 **Keitzer, S. C., T. K. Pauley, and C. L. Burcher.** 2013. Stream characteristics associated with  
434 site occupancy by the Eastern Hellbender, *Cryptobranchus alleganiensis alleganiensis*, in  
435 Southern West Virginia. *Northeastern Naturalist* 20(4):666-667.
- 436 **Keren-Rotem, T., A. Bouskila, and E. Geffen.** 2006. Ontogenetic habitat shift and risk of  
437 cannibalism in the common chameleon (*Chamaeleo chamaeleon*). *Behavioral Ecology*  
438 and *Sociobiology* 59(6):723-731.
- 439 **King A. J.** 2005. Ontogenetic dietary shifts of fishes in an Australian floodplain river. *Marine*  
440 *and Freshwater Research* 56(2):215-225.
- 441 **Lane, E. W.** 1947. Report of the subcommittee on sediment terminology. *Eos, Transactions*  
442 *American Geophysical Union*, 28(6): 936-938.
- 443 **Madden, M., R. Welch, T. R. Jordan, and P. Jackson.** 2004. Digital Vegetation Maps for the  
444 Great Smoky Mountains National Park. Final Report to U.S. Department of Interior,  
445 National Park Service, Great Smoky Mountains National Park, Gatlinburg, Tennessee, 44  
446 p.
- 447 **Mast, M. A., and J. T. Turk.** 1999. Environmental characteristics and water quality of  
448 hydrologic benchmark network stations in the eastern United States, 1963–95. U.S.  
449 Geological Survey Circular 1173–A, 158 p.
- 450 **Maxwell, N. J.** 2009. Baseline survey and habitat analysis of aquatic salamanders in the Pigeon  
451 River, North Carolina. M.S. Thesis. University of Tennessee, Knoxville. 55 p.
- 452 **Merigoux, S., and D. Ponton.** 1998. Body shape, diet, and ontogenetic shifts in young fish of the  
453 Sinnamary River, French Guiana, South America.

- 454 **Miller, B.T., and Miller, J.L.** 2005. Prevalence of physical abnormalities in eastern Hellbender  
455 (*Cryptobranchus alleganiensis alleganiensis*) populations of middle Tennessee.  
456 Southeastern Naturalist, 4(3):513-520.
- 457 **Mittelbach, G. G.** 1981. Foraging efficiency and body size: A study of optimal diet and habitat  
458 use by bluegills. Ecology 62(5):1370-1386.
- 459 **National Oceanic and Atmospheric Administration.** 2016. National Centers for Environmental  
460 Information. Data Tools: 1981-2010 Normals. Station Townsend S 5, TN, US.  
461 <http://www.ncdc.noaa.gov/cdo-web/datatools/normals>. Accessed 30 May 2016.
- 462 **Netting, M. G.** 1929. The food of the Hellbender, *Cryptobranchus alleganiensis* (Daudin).  
463 Copeia 1929:23-24.
- 464 **Nickerson, M. A., and C. E. Mays.** 1973. The Hellbenders: North American Giant Salamanders.  
465 Milwaukee Public Museum, Milwaukee, 106 p.
- 466 **Nickerson, M. A.** 1980. Return of captive Ozark hellbenders, *Cryptobranchus alleganiensis*  
467 *alleganiensis*, to site of capture. Copeia 1980(3):536-537.
- 468 **Nickerson, M. A., K. L. Krykso, and R. D. Owen.** 2003. Habitat differences affecting age class  
469 distributions of the Hellbender salamander, *Cryptobranchus alleganiensis*. Southeastern  
470 Naturalist 2:619-629.
- 471 **Nickerson, M. A., A. L. Pitt, and M. D. Prysby.** 2007. The effects of flooding on the  
472 Hellbender salamander, *Cryptobranchus alleganiensis* DAUDIN, 1803, populations.  
473 Salamandra 43(2):111-117.
- 474 **Peterson, C. L.** 1989. Seasonal food habits of *Cryptobranchus alleganiensis* (Caudata:  
475 Cryptobranchidae). The Southwestern Naturalist 34:438-441.
- 476 **Petranka, J. W.** 1984. Ontogeny of the diet and feeding behavior of *Eurycea bislineata* larvae.  
477 Journal of Herpetology 18(1):48-55.

- 478 **Pitt, A. L., and M. A. Nickerson.** 2006. *Cryptobranchus alleganiensis* (Hellbender salamander).  
479 Larval diet. Herpetological Review 37(1):69.
- 480 **Pitt, A. L., J. T. Tavano, and M. A. Nickerson.** 2016. *Cryptobranchus allegnaniensis bishopi*  
481 (Ozark Hellbender): Larval habitat and retreat behavior. The Herpetological Bulletin 138:  
482 36-37.
- 483 **Pitt, A. L., J. L. Shinskie, J. J. Tavano, S. M. Hartzell, T. Delahunty, and S. F. Spear.** 2017.  
484 Decline of a giant salamander assessed with historical records, environmental DNA and  
485 multi-scale habitat data. Freshwater Biology 62(6):967-976.
- 486 **R Core Team.** 2015. R: A language and environment for statistical computing. R Foundation for  
487 Statistical Computing, Vienna, Austria. URL <https://www.R-project.org/>.
- 488 **Rojas, J. M., and F. P. Ojeda.** 2010. Spatial distribution of intertidal fishes: a pattern dependent  
489 on body size and predation risk? Environmental Biology of Fishes 87(3):175-185.
- 490 **Rosenberger, A., and P. L. Angermeier.** 2003. Ontogenetic shifts in habitat use by the  
491 endangered Roanoke logperch (*Percina rex*). Freshwater Biology 48(9): 1563-1577.
- 492 **Schoener, T. W.** 1974. Resource partitioning in ecological communities. Science 185(4145): 27-  
493 39.
- 494 **Simonovic P. D., P. Garner, E. E. Eastwood, V. Kovac, and G. H. Copp.** 1999.  
495 Correspondence between ontogenetic shifts in morphology and habitat use in minnow  
496 *Phoxinus phoxinus*. Environmental Biology of Fishes 56(1):117-128.
- 497 **Smith, B. G.** 1907. The life history and habits of *Cryptobranchus alleganiensis*. Biological  
498 Bulletin 13(1):5-39.
- 499 **Tumlison, R., and G. R. Cline.** 2003. Association between the Oklahoma Salamander (*Eurycea*  
500 *tynerensis*) and Ordovician-Silurian Strata. The Southwestern Naturalist 48(1):93-95.

- 501 **Tumilson, R., G. R. Cline, and P. Zwank.** 1990. Surface habitat associations of the Oklahoma  
502 salamander (*Eurycea tynereensis*). *Herpetologica* 46:169-175.
- 503 **Unger, S. D., T. M. Sutton, and R. N. Williams.** 2013. Projected population persistence of  
504 eastern hellbenders (*Cryptobranchus alleganiensis alleganiensis*). *Journal for Nature*  
505 *Conservation* 21:423-432.
- 506 **Urban, M. C.** 2008. Salamander evolution across a latitudinal cline in gape-limited predation  
507 risk. *Oikos* 117(7):1037-1049.
- 508 **Werner E. E., and J. F. Gilliam.** 1984. The Ontogenetic Niche and Species Interactions in Size-  
509 Structured Populations. *Annu Rev Ecol Syst* 15:393-425.
- 510 **Werner, E. E., and D. J. Hall.** 1988. Ontogenetic habitat shifts in bluegill: The foraging rate-  
511 predation risk trade-off. *Ecology* 69(5):1352-1366.
- 512 **Wiggs, R. L.** 1977. Movement and homing in the hellbender, *Cryptobranchus alleganiensis*, in  
513 the Niangua River, Missouri. M.A. Thesis, Southwest Missouri State, Springfield, MO.
- 514 **Wilson, D. S.** 1975. The adequacy of body size as a niche difference. *The American Naturalist*  
515 109(970): 769-784.
- 516 **Wolman, M. G.** 1954, A method of sampling coarse river-bed material: *Transactions of the*  
517 *American Geophysical Union (EOS)* 35:951-956.
- 518 **Woodward, G., B. Ebenman, M. Emmerson, J. M. Montoya, J. M. Olesen, A. Valido, and P.**  
519 **H. Warren.** 2005. Body size in ecological networks. *Trends in Ecology & Evolution*  
520 20(7): 402-409.
- 521
- 522
- 523

524

525 **TABLES**

526 Table 1. Variable estimates and odds ratios from an ordinal logistic regression model based on  
527 streambed particle size classes at sites used by larval (n=25), sub-adult (n=26), and adult (n=38)  
528 Hellbenders (*Cryptobranchus alleganiensis*) captured in Little River, Tennessee.

| Variable           | Estimate | Standard error | Wald statistic (Z) | p-value | Odds ratio |
|--------------------|----------|----------------|--------------------|---------|------------|
| <4 mm              | 1.09     | 1.36           | 0.80               | 0.43    | 2.96       |
| Fine gravel        | 0.66     | 1.13           | 0.58               | 0.56    | 1.93       |
| Medium gravel      | -0.39    | 0.54           | -0.73              | 0.47    | 0.68       |
| Coarse gravel      | -0.23    | 0.48           | -0.48              | 0.62    | 0.79       |
| Very coarse gravel | 2.13     | 1.20           | 1.78               | 0.07    | 8.45       |
| Small cobble       | -0.54    | 0.46           | -1.19              | 0.23    | 0.58       |
| Large cobble       | -0.52    | 0.49           | -1.06              | 0.29    | 0.59       |

529

530



531 Table 2. Variable estimates and odds ratios from a binomial logistic regression model based on  
532 streambed particle size classes at sites used by Hellbenders (*Cryptobranchus alleganiensis*)  
533 (n=89) and random locations (n=50) within Little River, TN.

| Variable           | Estimate | Standard error | Wald statistic (Z) | p-value | Odds ratio |
|--------------------|----------|----------------|--------------------|---------|------------|
| Intercept          | -0.60    | 0.77           | -0.78              | 0.43    | 0.55       |
| <4 mm              | -1.40    | 0.82           | -1.71              | 0.09    | 0.25       |
| Fine gravel        | -1.89    | 0.71           | -2.67              | 0.01    | 0.15       |
| Medium gravel      | -0.35    | 0.60           | -0.58              | 0.56    | 0.71       |
| Coarse gravel      | 0.95     | 0.54           | 1.76               | 0.08    | 2.60       |
| Very coarse gravel | 1.56     | 0.64           | 2.46               | 0.01    | 4.78       |
| Small cobble       | -0.25    | 0.51           | -0.49              | 0.62    | 0.78       |
| Large cobble       | 1.00     | 0.67           | 1.49               | 0.14    | 2.71       |

534

535

536

537

538

539 Table 3. Variable estimates and odds ratios from a binomial logistic regression model based on  
540 streambed particle size classes (with particles <32 mm combined into one category) at sites used  
541 by Hellbenders (*Cryptobranchus alleganiensis*) (n=89) and random locations (n=50) within Little  
542 River, Tennessee.

| Variable           | Estimate | Standard error | Wald statistic (Z) | p-value | Odds ratio |
|--------------------|----------|----------------|--------------------|---------|------------|
| Intercept          | -1.87    | 0.70           | -2.67              | 0.008   | 0.15       |
| <32 mm             | 0.13     | 0.48           | 0.27               | 0.79    | 1.14       |
| Very coarse gravel | 2.69     | 0.55           | 4.85               | <0.001  | 14.69      |
| Small cobble       | 0.17     | 0.43           | 0.41               | 0.69    | 1.19       |
| Large cobble       | 0.91     | 0.61           | 1.50               | 0.13    | 2.50       |

543

544

545

546

547

548

549

550

551 **FIGURE LEGENDS**

552 Figure 1. Bar graph showing mean  $\pm$  standard error of the mean (SEM) for conductivity ( $\mu\text{S}/\text{cm}$ )  
553 used by three stage classes of *Cryptobranchus alleganiensis*, larvae (n=13), sub-adults (n=22),  
554 and adults (n=43), in Little River, Tennessee. Bars with different letters above are significantly  
555 different ( $p < 0.05$ ).

556 Figure 2. Scatter plot with linear regression line of shelter size (mm) vs. *Cryptobranchus*  
557 *alleganiensis* total length (mm) in Little River, Tennessee (n=217).

558 Figure 3. Bar graph showing mean  $\pm$  standard error of the mean (SEM) for shelter size (mm) used  
559 by three stage classes of *Cryptobranchus alleganiensis*, larvae (n=61), sub-adults (n=56), and  
560 adults (n=100), in Little River, Tennessee. Bars with different letters above are significantly  
561 different ( $p < 0.05$ ).

562

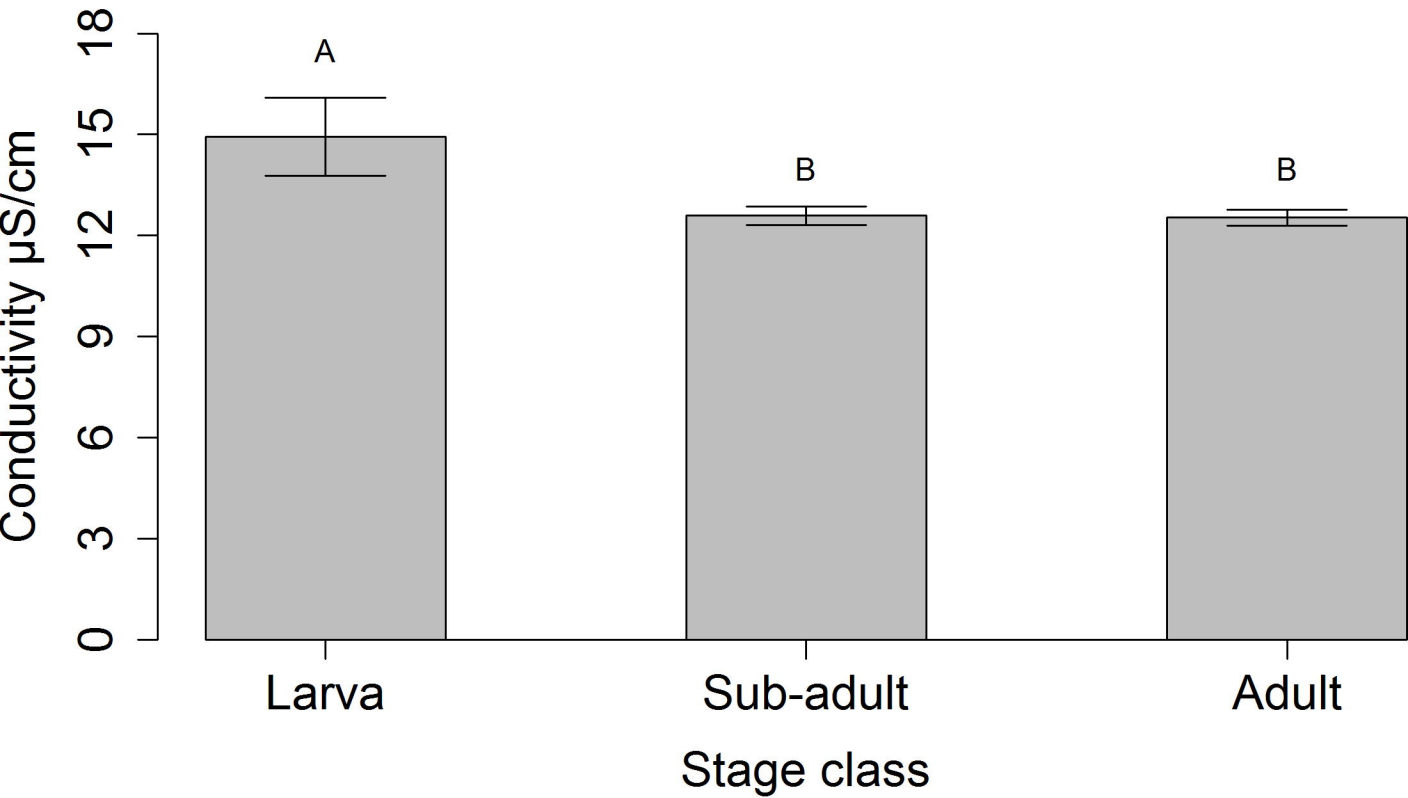

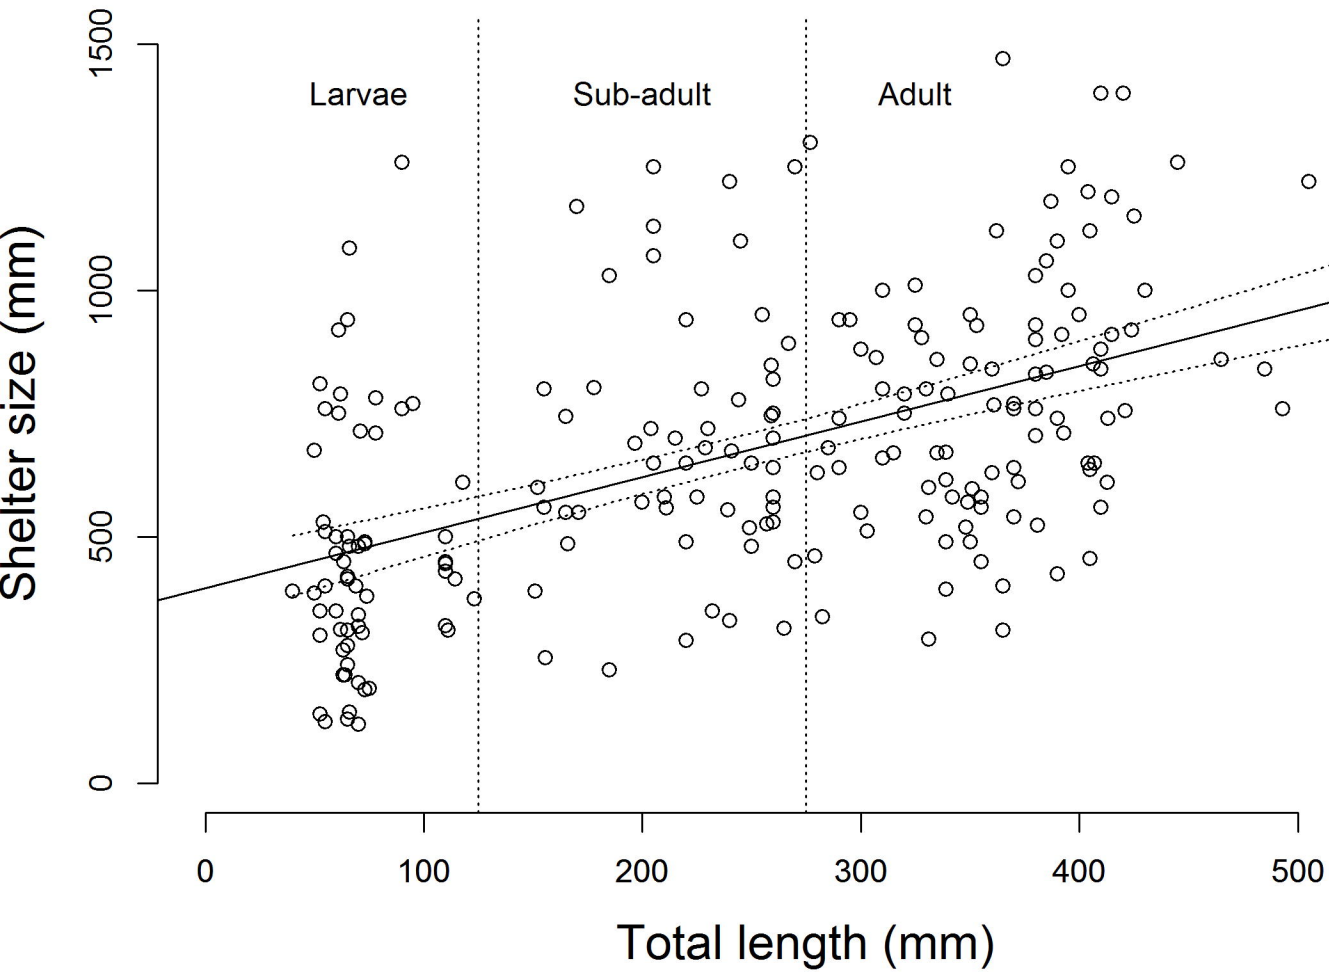

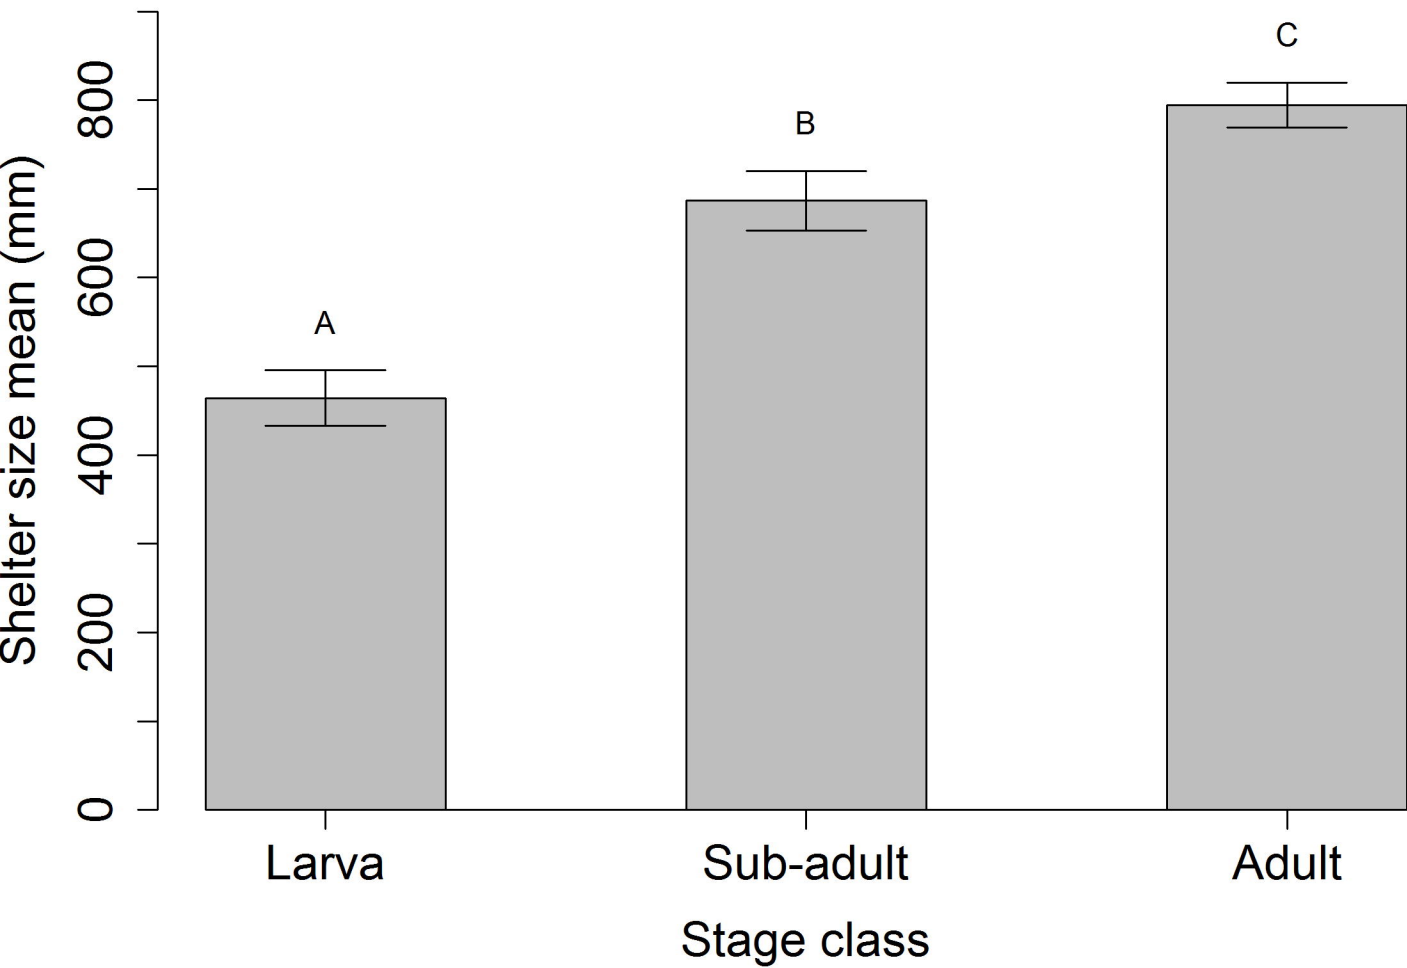

Source: https://www.biorxiv.org/content/10.1101/139766v1.full.pdf
